# Supplementary material for: Altered Plasma microRNA Signature in Hospitalized COVID-19 Patients Requiring Oxygen Support
Source: MDPI journal article supplement (doi:10.3390/microorganisms12030440), 2024-02-21
Supplement: s1 [file s1]

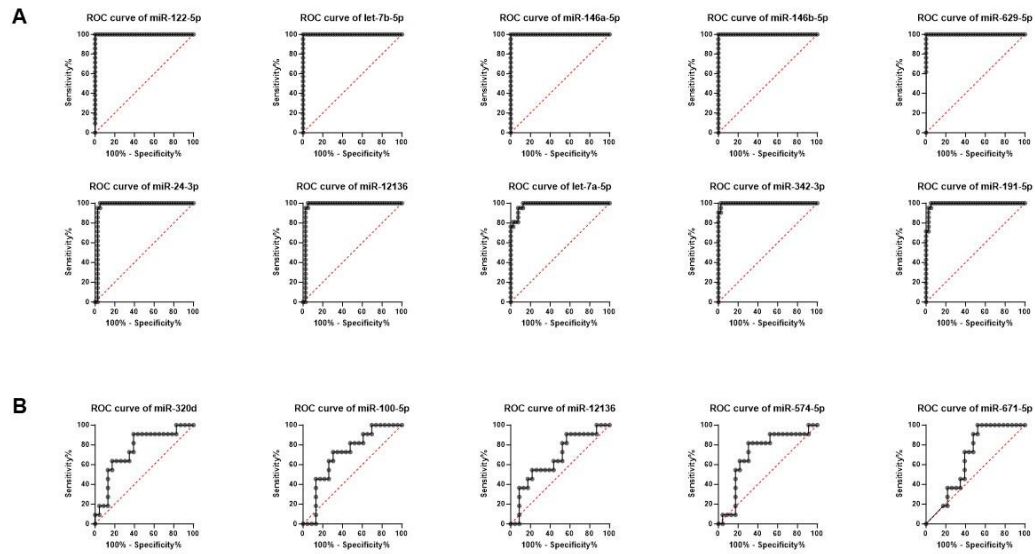

**Supplementary Figure S2.** ROC curves show the diagnostic performance of study miRNAs. **A)** ROC curves of the top 10 DE miRNAs (miR-122-5p, let-7b-5p, miR-146a-5p, miR-146b-5p, miR-629-5p, miR-24-3p, miR-12136, let-7a-5p, miR-342-3p, and miR-191-5p) between SARS-CoV-2-infected patients versus uninfected healthy individuals and **B)** ROC curves of the top 5 DE miRNAs (miR-320d, miR-100-5p, miR-12136, miR-574-5p and miR-671-5p) between SARS-CoV-2-infected patients requiring high-flow versus low-flow oxygen support.
