# Supplementary material for: Altered Plasma microRNA Signature in Hospitalized COVID-19 Patients Requiring Oxygen Support
Source: MDPI journal article supplement (doi:10.3390/microorganisms12030440), 2024-02-21
Supplement: s1 [file s1]

**Supplementary Table S3** Differential expression at the total miRNA level between SARS-CoV-2–infected patients requiring high-flow versus no oxygen support.

| <b>miRNA</b>    | <b>Base mean<sup>a</sup></b> | <b>Fold Change<sup>b</sup></b> | <b>p adjusted<sup>c</sup></b> |
|-----------------|------------------------------|--------------------------------|-------------------------------|
| hsa-miR-671-5p  | 75.57                        | 22.47                          | 0.00519451                    |
| hsa-miR-6819-5p | 11.13                        | 14.22                          | 0.00420542                    |
| hsa-miR-100-5p  | 277.51                       | 3.05                           | 0.01181046                    |
| hsa-miR-1306-3p | 18.82                        | 4.56                           | 0.01227122                    |
| hsa-miR-3688-3p | 20.97                        | -3.36                          | 0.03054533                    |
| hsa-miR-4646-5p | 12.31                        | 3.71                           | 0.03846312                    |

<sup>a</sup>The average of the normalized count values according to DeSeq2.

<sup>b</sup>The effect size estimate according to DeSeq2.

<sup>c</sup>P value adjusted for false discovery rate by the method of Benjamini and Hochberg.
