# Supplementary material for: Altered Plasma microRNA Signature in Hospitalized COVID-19 Patients Requiring Oxygen Support
Source: MDPI journal article supplement (doi:10.3390/microorganisms12030440), 2024-02-21
Supplement: s1 [file s1]

**A**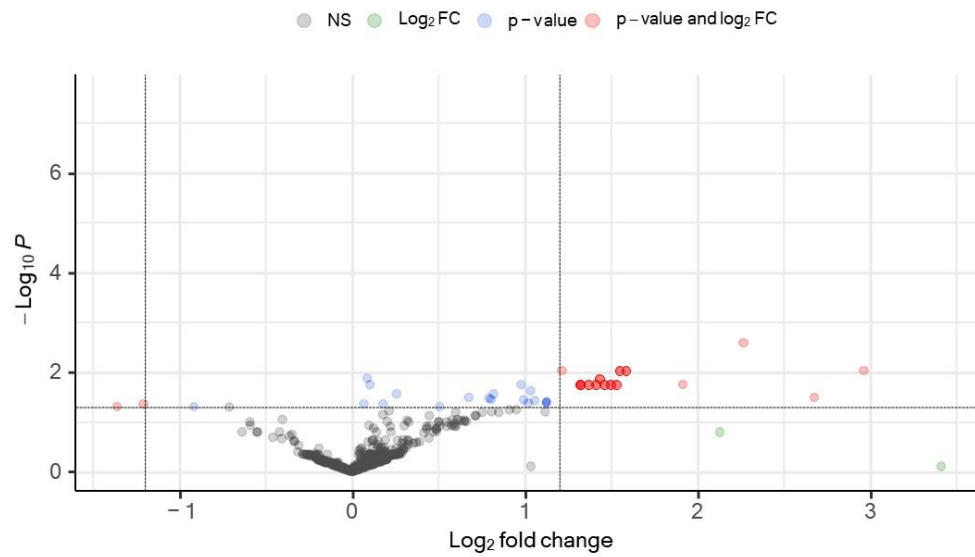**B**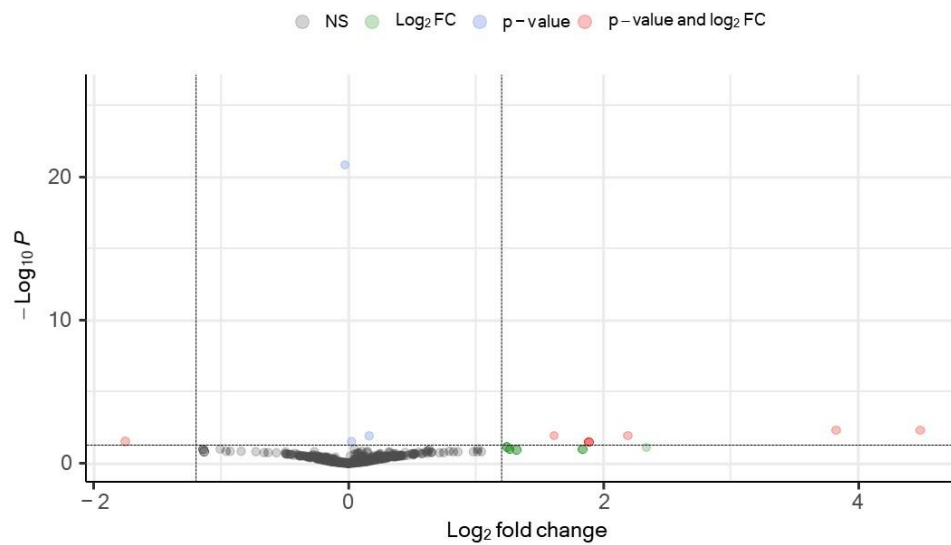

**Supplementary Figure S1. Volcano plot of differentially regulated baseline plasma circulating microRNAs in baseline microRNA patterns in hospitalized SARS-CoV-2 acute infected patients.** Differentially expressed (DE) miRNAs were determined by comparing plasma miRNA expression profiles between **A)** SARS-CoV-2 patients requiring high-flow or low-flow oxygen support and **B)** SARS-CoV-2 patients requiring high-flow oxygen or no oxygen support. To

identify biomarker candidates, cutoffs of effect size (fold change [FC] >1.2) and significance level (adjusted p [padj] <0.05) were used. Sets of 31 and 6 DE (red) miRNAs were identified, respectively.
