# Supplementary material for: Altered Plasma microRNA Signature in Hospitalized COVID-19 Patients Requiring Oxygen Support
Source: MDPI journal article supplement (doi:10.3390/microorganisms12030440), 2024-02-21
Supplement: s1 [file s1]

**Supplementary Table S2.** Differential expression at the total miRNA level between SARS-CoV-2–infected patients requiring high-flow versus low-flow oxygen support.

| miRNA             | Base mean <sup>a</sup> | Fold Change <sup>b</sup> | p adjusted <sup>c</sup> |
|-------------------|------------------------|--------------------------|-------------------------|
| hsa-miR-320d      | 364.54                 | 4.79                     | 0.00255151              |
| hsa-miR-100-5p    | 277.51                 | 2.31                     | 0.00918043              |
| hsa-miR-12136     | 429.43                 | 2.99                     | 0.00918043              |
| hsa-miR-574-5p    | 158.823                | 2.93                     | 0.00918043              |
| hsa-miR-671-5p    | 75.573                 | 7.78                     | 0.00918043              |
| hsa-miR-1307-3p   | 1713.60                | 2.69                     | 0.0132755               |
| hsa-miR-127-3p    | 33515.55               | 2.50                     | 0.01774758              |
| hsa-miR-1275      | 42.775                 | 3.76                     | 0.01774758              |
| hsa-miR-1908-3p   | 145.16                 | 2.66                     | 0.01774758              |
| hsa-miR-30c-1-3p  | 192.68                 | 1.96                     | 0.01774758              |
| hsa-miR-320a-3p   | 28912.58               | 2.50                     | 0.01774758              |
| hsa-miR-331-3p    | 131.21                 | 2.58                     | 0.01774758              |
| hsa-miR-337-5p    | 7.71                   | 2.75                     | 0.01774758              |
| hsa-miR-378a-3p   | 10825.97               | 2.81                     | 0.01774758              |
| hsa-miR-378d      | 443.14                 | 2.89                     | 0.01774758              |
| hsa-miR-185-3p    | 249.53                 | 2.04                     | 0.02343964              |
| hsa-let-7i-5p     | 47716.11               | 1.75                     | 0.02722205              |
| hsa-miR-191-3p    | 302.38                 | 1.59                     | 0.03204814              |
| hsa-miR-193b-5p   | 97.87                  | 6.36                     | 0.03204814              |
| hsa-miR-423-3p    | 30856.677              | 1.73                     | 0.03329827              |
| hsa-miR-339-5p    | 446.317                | 1.74                     | 0.03513266              |
| hsa-miR-17-3p     | 369.33                 | 1.99                     | 0.03601704              |
| hsa-miR-320b      | 113.88                 | 2.07                     | 0.03706333              |
| hsa-miR-134-5p    | 748.97                 | 2.17                     | 0.03900094              |
| hsa-miR-1273h-5p  | 76.97                  | 2.17                     | 0.04065254              |
| hsa-miR-7848-3p   | 9.86                   | 2.17                     | 0.0407411               |
| hsa-miR-423-5p    | 466152.26              | 2.01                     | 0.04158325              |
| hsa-miR-582-3p    | 13.676                 | -2.31                    | 0.0432867               |
| hsa-miR-561-5p    | 5.856                  | -2.57                    | 0.04918054              |
| hsa-miR-144-5p    | 603.74                 | -1.89                    | 0.04932173              |
| hsa-miR-181a-2-3p | 522.59                 | 1.41                     | 0.04932173              |

<sup>a</sup>The average of the normalized count values according to DeSeq2.

<sup>b</sup>The effect size estimate according to DeSeq2.

<sup>c</sup>P value adjusted for false discovery rate by the method of Benjamini and Hochberg.
