# Supplementary material for: Altered Plasma microRNA Signature in Hospitalized COVID-19 Patients Requiring Oxygen Support
Source: MDPI journal article supplement (doi:10.3390/microorganisms12030440), 2024-02-21
Supplement: s1 [file s1]

**Supplementary Table S1.** Differential expression at the total miRNA level for SARS-CoV-2–infected patients versus uninfected healthy individuals.

| miRNA            | Base mean <sup>a</sup> | Fold Change <sup>b</sup> | p adjusted <sup>c</sup> |
|------------------|------------------------|--------------------------|-------------------------|
| hsa-miR-122-5p   | 1313.30                | 95.01                    | 2.51E-32                |
| hsa-let-7b-5p    | 12193.88               | 14.82                    | 6.46E-32                |
| hsa-miR-146a-5p  | 16302.81               | 11.79                    | 5.50E-26                |
| hsa-miR-342-3p   | 1399.90                | -10.85                   | 9.50E-26                |
| hsa-miR-146b-5p  | 1994.97                | 21.11                    | 1.83E-25                |
| hsa-miR-629-5p   | 82.34                  | 153.28                   | 3.76E-25                |
| hsa-miR-24-3p    | 567.24                 | 11.71                    | 1.11E-24                |
| hsa-miR-12136    | 429.31                 | 48.84                    | 4.14E-23                |
| hsa-let-7a-5p    | 29587.51               | 10.93                    | 4.65E-22                |
| hsa-miR-191-5p   | 303583.51              | -4.75                    | 2.21E-21                |
| hsa-let-7c-5p    | 387.92                 | 10.27                    | 2.45E-20                |
| hsa-miR-1260b    | 309.64                 | 6.50                     | 2.68E-19                |
| hsa-let-7e-5p    | 3253.50                | 10.41                    | 1.73E-17                |
| hsa-miR-23a-5p   | 51.87                  | 120.26                   | 4.53E-17                |
| hsa-miR-223-5p   | 344.40                 | 4.35                     | 4.40E-15                |
| hsa-miR-6804-5p  | 23.44                  | 304.44                   | 1.33E-14                |
| hsa-miR-574-5p   | 158.46                 | 20.11                    | 1.73E-14                |
| hsa-miR-98-5p    | 2116.63                | 6.77                     | 7.70E-14                |
| hsa-miR-6837-3p  | 90.14                  | -5.74                    | 7.98E-14                |
| hsa-miR-1908-3p  | 139.86                 | 22.32                    | 1.02E-13                |
| hsa-let-7g-5p    | 5961.40                | 5.10                     | 2.03E-13                |
| hsa-miR-30b-5p   | 2098.68                | -5.54                    | 2.66E-13                |
| hsa-miR-589-5p   | 593.33                 | 3.36                     | 1.37E-12                |
| hsa-miR-150-5p   | 3699.99                | -7.31                    | 3.39E-12                |
| hsa-miR-328-3p   | 976.41                 | 4.96                     | 3.70E-12                |
| hsa-miR-26b-3p   | 728.45                 | -4.23                    | 9.72E-12                |
| hsa-miR-181a-5p  | 62830.61               | -3.16                    | 3.59E-11                |
| hsa-miR-182-5p   | 2886.55                | -3.46                    | 1.24E-10                |
| hsa-miR-188-5p   | 33.34                  | -16.68                   | 2.56E-10                |
| hsa-miR-145-5p   | 111.63                 | -6.28                    | 3.38E-10                |
| hsa-miR-574-3p   | 264.67                 | 3.20                     | 3.38E-10                |
| hsa-miR-130b-5p  | 327.56                 | 3.73                     | 4.68E-10                |
| hsa-miR-142-3p   | 818.85                 | -4.47                    | 6.70E-10                |
| hsa-let-7f-5p    | 81822.16               | 3.94                     | 9.01E-10                |
| hsa-miR-199b-3p  | 14190.56               | 2.48                     | 9.69E-10                |
| hsa-miR-10b-5p   | 28621.20               | -4.76                    | 5.96E-09                |
| hsa-miR-577      | 20.33                  | -15.35                   | 7.16E-09                |
| hsa-miR-548e-3p  | 113.04                 | 2.71                     | 3.00E-08                |
| hsa-miR-7849-3p  | 109.44                 | -3.51                    | 5.30E-08                |
| hsa-miR-186-3p   | 12.61                  | -17.75                   | 6.06E-08                |
| hsa-miR-193b-5p  | 97.93                  | 19.70                    | 6.06E-08                |
| hsa-miR-4433b-5p | 820.07                 | 3.63                     | 6.06E-08                |

|                  |          |        |            |
|------------------|----------|--------|------------|
| hsa-miR-193a-3p  | 5.33     | -34.54 | 7.77E-08   |
| hsa-miR-128-3p   | 4061.79  | 2.17   | 9.21E-08   |
| hsa-miR-4741     | 23.45    | 20.11  | 1.12E-07   |
| hsa-miR-21-3p    | 7034.52  | -2.43  | 1.15E-07   |
| hsa-miR-193a-5p  | 10.76    | 67.18  | 1.19E-07   |
| hsa-miR-10399-5p | 244.03   | 3.32   | 3.65E-07   |
| hsa-miR-654-5p   | 115.83   | 5.66   | 4.30E-07   |
| hsa-miR-181c-5p  | 1485.90  | -2.87  | 5.12E-07   |
| hsa-miR-877-5p   | 2437.74  | -4.26  | 1.71E-06   |
| hsa-miR-628-3p   | 309.27   | -3.41  | 2.26E-06   |
| hsa-miR-423-3p   | 30851.04 | 3.18   | 2.93E-06   |
| hsa-miR-1285-3p  | 460.89   | -3.16  | 3.66E-06   |
| hsa-miR-3173-5p  | 13.06    | 6.19   | 5.62E-06   |
| hsa-miR-381-3p   | 1182.08  | -4.56  | 5.62E-06   |
| hsa-miR-3168     | 72.72    | 103.25 | 6.85E-06   |
| hsa-miR-148b-3p  | 5441.18  | -1.96  | 7.32E-06   |
| hsa-miR-1908-5p  | 44.88    | 5.90   | 8.57E-06   |
| hsa-miR-885-5p   | 20.46    | 13.18  | 9.56E-06   |
| hsa-miR-4657     | 12.50    | 23.43  | 1.25E-05   |
| hsa-miR-10a-5p   | 24773.78 | -2.58  | 1.26E-05   |
| hsa-miR-186-5p   | 26793.94 | -1.74  | 1.65E-05   |
| hsa-miR-4531     | 26.64    | 2.48   | 1.65E-05   |
| hsa-miR-134-5p   | 748.81   | 5.78   | 1.67E-05   |
| hsa-miR-1294     | 7.58     | 13.83  | 1.87E-05   |
| hsa-miR-494-3p   | 46.36    | -4.08  | 1.93E-05   |
| hsa-let-7i-5p    | 47729.96 | 2.89   | 2.09E-05   |
| hsa-miR-6763-5p  | 22.80    | 1.75   | 2.11E-05   |
| hsa-miR-376a-5p  | 38.02    | -5.78  | 2.49E-05   |
| hsa-miR-411-3p   | 17.81    | -4.00  | 2.89E-05   |
| hsa-let-7d-3p    | 3545.22  | 2.28   | 3.04E-05   |
| hsa-miR-3173-3p  | 4.44     | 17.88  | 3.84E-05   |
| hsa-miR-6842-3p  | 225.38   | -2.91  | 3.84E-05   |
| hsa-let-7d-5p    | 4120.77  | 2.16   | 5.69E-05   |
| hsa-miR-874-3p   | 78.00    | -2.85  | 6.44E-05   |
| hsa-miR-28-5p    | 1378.73  | 1.60   | 7.36E-05   |
| hsa-miR-582-3p   | 14.01    | -4.92  | 7.90E-05   |
| hsa-miR-1255b-5p | 9.38     | 12.21  | 8.58E-05   |
| hsa-miR-483-5p   | 128.56   | 13.55  | 9.48E-05   |
| hsa-miR-484      | 3913.69  | 1.65   | 0.00011099 |
| hsa-miR-486-3p   | 1107.54  | 2.43   | 0.00014081 |
| hsa-miR-224-5p   | 192.51   | -3.25  | 0.00020053 |
| hsa-miR-7110-5p  | 16.49    | 1.33   | 0.00035199 |
| hsa-miR-5683     | 31.12    | -4.63  | 0.0004265  |
| hsa-miR-148b-5p  | 103.76   | -2.57  | 0.00048516 |
| hsa-miR-199a-5p  | 1231.29  | -1.79  | 0.00049544 |
| hsa-miR-4687-3p  | 18.44    | 1.85   | 0.00053459 |

|                   |            |        |            |
|-------------------|------------|--------|------------|
| hsa-miR-15a-3p    | 2.29       | -18.51 | 0.00055438 |
| hsa-miR-548ax     | 27.45      | -2.23  | 0.00061659 |
| hsa-miR-4746-5p   | 53.97      | -2.10  | 0.00070581 |
| hsa-miR-486-5p    | 1209535.88 | -2.19  | 0.00072654 |
| hsa-miR-103a-2-5p | 16.68      | -5.31  | 0.00073059 |
| hsa-miR-3677-3p   | 19.59      | -7.62  | 0.00079776 |
| hsa-miR-152-5p    | 12.82      | -3.84  | 0.00083844 |
| hsa-miR-26a-5p    | 119270.43  | -1.96  | 0.00084999 |
| hsa-miR-144-3p    | 760.43     | -2.71  | 0.00093239 |
| hsa-miR-125a-3p   | 18.95      | 4.44   | 0.00094233 |
| hsa-miR-758-3p    | 47.81      | -2.99  | 0.00094233 |
| hsa-miR-2467-5p   | 13.06      | -3.48  | 0.00104643 |
| hsa-miR-497-5p    | 99.39      | -2.50  | 0.00104924 |
| hsa-miR-615-3p    | 3.13       | -19.16 | 0.0012779  |
| hsa-miR-937-3p    | 12.11      | 3.34   | 0.00138689 |
| hsa-miR-101-5p    | 10.99      | -4.29  | 0.00147975 |
| hsa-miR-127-5p    | 19.91      | -5.62  | 0.00147975 |
| hsa-miR-1306-5p   | 13.30      | 3.10   | 0.00148194 |
| hsa-miR-320d      | 353.67     | 4.26   | 0.00149759 |
| hsa-miR-183-5p    | 95.95      | -3.36  | 0.00157936 |
| hsa-miR-6511b-3p  | 29.59      | 3.65   | 0.00161186 |
| hsa-miR-22-3p     | 537575.27  | 2.03   | 0.0017982  |
| hsa-miR-10b-3p    | 4.64       | -6.36  | 0.00186359 |
| hsa-miR-4786-5p   | 7.93       | -4.32  | 0.00240482 |
| hsa-miR-500a-3p   | 534.36     | -2.07  | 0.00255457 |
| hsa-miR-1275      | 42.17      | 4.69   | 0.00289855 |
| hsa-miR-1307-5p   | 2755.93    | -2.13  | 0.00293017 |
| hsa-miR-1296-5p   | 31.29      | -2.57  | 0.00344013 |
| hsa-miR-125a-5p   | 4522.33    | -2.06  | 0.00349616 |
| hsa-miR-190a-5p   | 14.06      | -3.43  | 0.00350676 |
| hsa-miR-1285-5p   | 4.39       | 7.78   | 0.00370909 |
| hsa-miR-323a-3p   | 91.61      | -2.50  | 0.00406705 |
| hsa-miR-625-3p    | 236.66     | 2.69   | 0.00421319 |
| hsa-miR-345-5p    | 951.84     | 1.69   | 0.00461837 |
| hsa-miR-589-3p    | 36.39      | -2.48  | 0.00462275 |
| hsa-miR-887-3p    | 3.13       | -7.41  | 0.00462275 |
| hsa-miR-361-3p    | 190.26     | 1.85   | 0.00469694 |
| hsa-miR-6843-3p   | 10.38      | 3.46   | 0.00483652 |
| hsa-miR-185-5p    | 42.16      | 3.07   | 0.00487442 |
| hsa-miR-33a-5p    | 59.81      | -2.10  | 0.00487442 |
| hsa-miR-369-3p    | 164.54     | -2.50  | 0.00505921 |
| hsa-miR-425-3p    | 116.73     | -1.69  | 0.00556425 |
| hsa-miR-136-5p    | 72.47      | -2.33  | 0.00698101 |
| hsa-miR-1468-5p   | 317.95     | -1.79  | 0.00717601 |
| hsa-miR-542-3p    | 9.26       | 3.32   | 0.00729782 |
| hsa-miR-203a-3p   | 9.12       | 3.43   | 0.00760719 |

|                  |           |        |            |
|------------------|-----------|--------|------------|
| hsa-miR-6810-5p  | 4.04      | -6.19  | 0.00892644 |
| hsa-miR-128-1-5p | 56.33     | -1.97  | 0.00951947 |
| hsa-miR-548o-5p  | 44.69     | -1.96  | 0.00951947 |
| hsa-miR-370-3p   | 279.02    | -2.75  | 0.01091894 |
| hsa-miR-423-5p   | 466133.15 | 2.71   | 0.01091894 |
| hsa-miR-576-5p   | 64.95     | 2.19   | 0.01125822 |
| hsa-miR-889-3p   | 320.09    | -2.55  | 0.01171197 |
| hsa-miR-487b-3p  | 208.88    | -2.07  | 0.01205707 |
| hsa-miR-6515-5p  | 36.01     | 2.69   | 0.01205707 |
| hsa-let-7f-1-3p  | 21.82     | 2.53   | 0.01451649 |
| hsa-miR-584-3p   | 3.74      | -3.55  | 0.01494697 |
| hsa-miR-342-5p   | 136.99    | 2.11   | 0.01571134 |
| hsa-miR-24-2-5p  | 46.22     | -1.91  | 0.01602991 |
| hsa-miR-138-5p   | 7.79      | -3.71  | 0.01632269 |
| hsa-miR-33a-3p   | 10.08     | -2.93  | 0.01634623 |
| hsa-miR-1292-5p  | 8.32      | -3.63  | 0.01786217 |
| hsa-miR-375-3p   | 1074.38   | -2.22  | 0.01788263 |
| hsa-miR-410-3p   | 1795.83   | -2.13  | 0.01875577 |
| hsa-miR-4448     | 16.70     | 4.53   | 0.02015719 |
| hsa-miR-4775     | 9.98      | -2.75  | 0.02016087 |
| hsa-miR-545-3p   | 1.61      | -15.24 | 0.02078413 |
| hsa-miR-6832-5p  | 4.35      | -4.08  | 0.02308529 |
| hsa-miR-30a-5p   | 3523.69   | 1.73   | 0.02346137 |
| hsa-miR-197-3p   | 266.75    | 1.57   | 0.02464744 |
| hsa-miR-331-3p   | 131.30    | -2.31  | 0.02618439 |
| hsa-miR-4435     | 124.86    | -1.77  | 0.026672   |
| hsa-miR-452-5p   | 30.82     | 2.79   | 0.02796616 |
| hsa-miR-338-3p   | 144.10    | -1.71  | 0.02885367 |
| hsa-miR-760      | 12.41     | 2.55   | 0.02900832 |
| hsa-miR-151a-3p  | 71062.92  | -1.28  | 0.03094333 |
| hsa-miR-369-5p   | 139.89    | -2.11  | 0.03295771 |
| hsa-miR-4645-3p  | 14.94     | -1.99  | 0.03344232 |
| hsa-miR-6777-3p  | 5.01      | 3.39   | 0.03416958 |
| hsa-miR-200a-3p  | 11.23     | -2.66  | 0.03428082 |
| hsa-miR-664b-5p  | 2.36      | 47.50  | 0.03428082 |
| hsa-miR-5189-3p  | 30.96     | -2.62  | 0.03466647 |
| hsa-miR-11400    | 497.23    | -1.65  | 0.03530447 |
| hsa-miR-7976     | 32.55     | 2.64   | 0.03624748 |
| hsa-miR-431-3p   | 35.58     | -2.03  | 0.03768563 |
| hsa-miR-20a-3p   | 3.92      | -2.97  | 0.03789382 |
| hsa-miR-6891-5p  | 3.14      | 2.25   | 0.03789382 |
| hsa-miR-299-3p   | 18.93     | -2.43  | 0.0388085  |
| hsa-miR-196b-5p  | 76.69     | 2.08   | 0.03908651 |
| hsa-miR-30e-3p   | 1538.75   | -1.32  | 0.04042597 |
| hsa-miR-3158-3p  | 115.69    | -2.38  | 0.04084722 |
| hsa-miR-320a-3p  | 28910.15  | 2.30   | 0.04316291 |

|                 |         |       |            |
|-----------------|---------|-------|------------|
| hsa-miR-34a-5p  | 2.55    | 2.13  | 0.04341515 |
| hsa-miR-450b-5p | 67.36   | 1.97  | 0.0453496  |
| hsa-miR-130a-3p | 5512.58 | -1.49 | 0.04656576 |
| hsa-miR-154-5p  | 6.22    | -2.87 | 0.04807832 |
| hsa-miR-4454    | 20.25   | -1.83 | 0.04810743 |
| hsa-miR-411-5p  | 686.10  | -2.00 | 0.04892527 |
| hsa-miR-6818-5p | 6.11    | -2.17 | 0.04975826 |
| hsa-miR-532-5p  | 1095.76 | -1.58 | 0.04979005 |
| hsa-miR-548l    | 3.49    | -2.75 | 0.04979045 |
| hsa-miR-6862-5p | 15.01   | 2.91  | 0.04979045 |

<sup>a</sup>The average of the normalized count values according to DeSeq2.

<sup>b</sup>The effect size estimate according to DeSeq2.

<sup>c</sup>P value adjusted for false discovery rate by the method of Benjamini and Hochberg.
